# Supplementary material
Source: publisher figshare collection journal article supplement (https://tandf.figshare.com/ndownloader/files/2178437)
Supplement: Supplementary file 1 [file 2178437]

## Sheet: Sheet1
Table S7. Primers sequences and melting temperatures
For TAB-Seq
Gene name	CpG ID	Forward primer	Reverse primer	Melting temperature (˚C)
COL4A6	cg12737160	TTA TTT TTT GAG TGT TGT AAG TTG T	CAA CAA CAA CTC ACC CAA AAT A	55
PRKX	cg06015784	TGT ATT TTT TTG GGG AAA GGG	CAA ATA AAC ATT CCT TTA AAA AAC TAA AAA	55
Legend: Primers for TAB-seq experiments are described.
